# Supplementary material
Source: PubMed Central journal article supplement (PMC5408455)
Supplement: NIHMS838162-supplement-1.pdf [file NIHMS838162-supplement-1.pdf]

**SUPPLEMENTAL FIGURES AND LEGENDS**

**A**

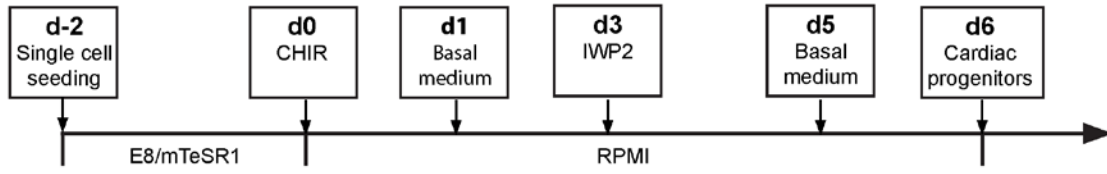

**B**

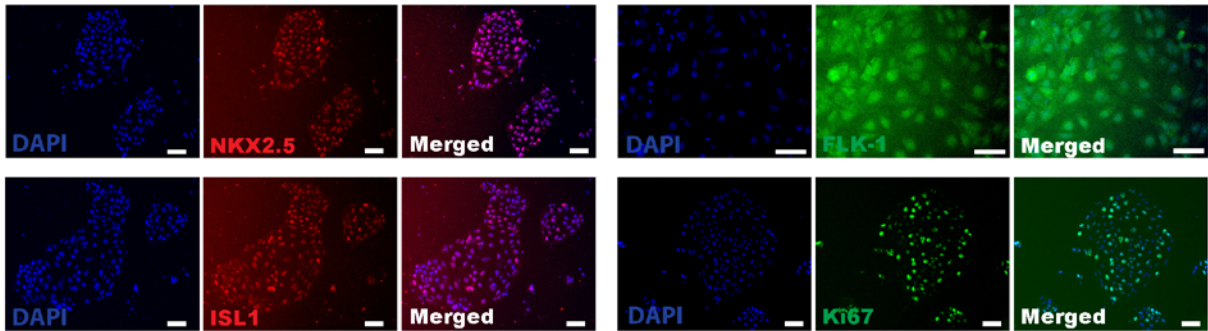

**C**

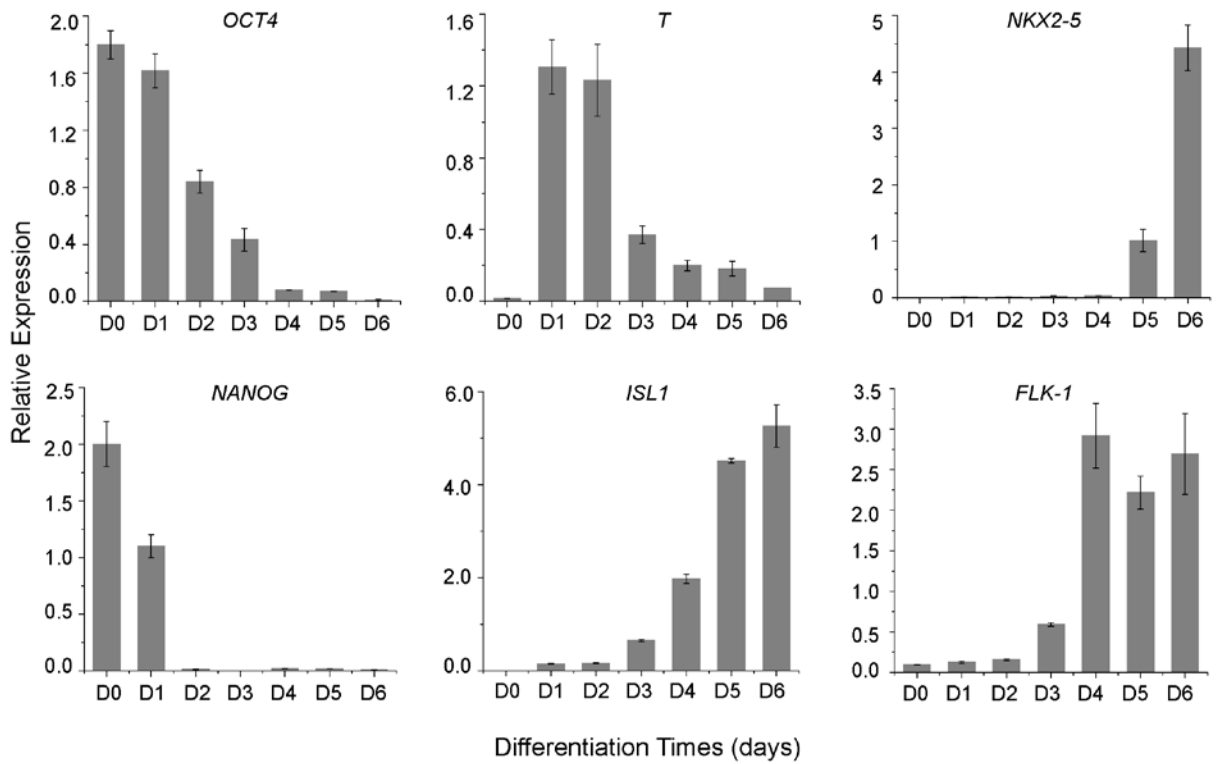

**Figure S1.** Albumin-free differentiation of NKX2.5+ISL1+FLK-1+ cardiac progenitors from hPSCs by small molecule modulation of Wnt signaling. (A) Schematic of the protocol for defined, albumin-free differentiation of hPSCs to cardiac progenitors in RPMI medium. (B) H13 hESC were differentiated as illustrated in (A), re-passaged on day 6 and immunostained with indicated markers on day 7. Scale bars, 100  $\mu$ m. (C) H13 hESC were differentiated as illustrated in (A) and developmental gene expression was assessed by quantitative RT-PCR at indicated time points. Data are represented as mean  $\pm$  SEM of three independent replicates.

**A**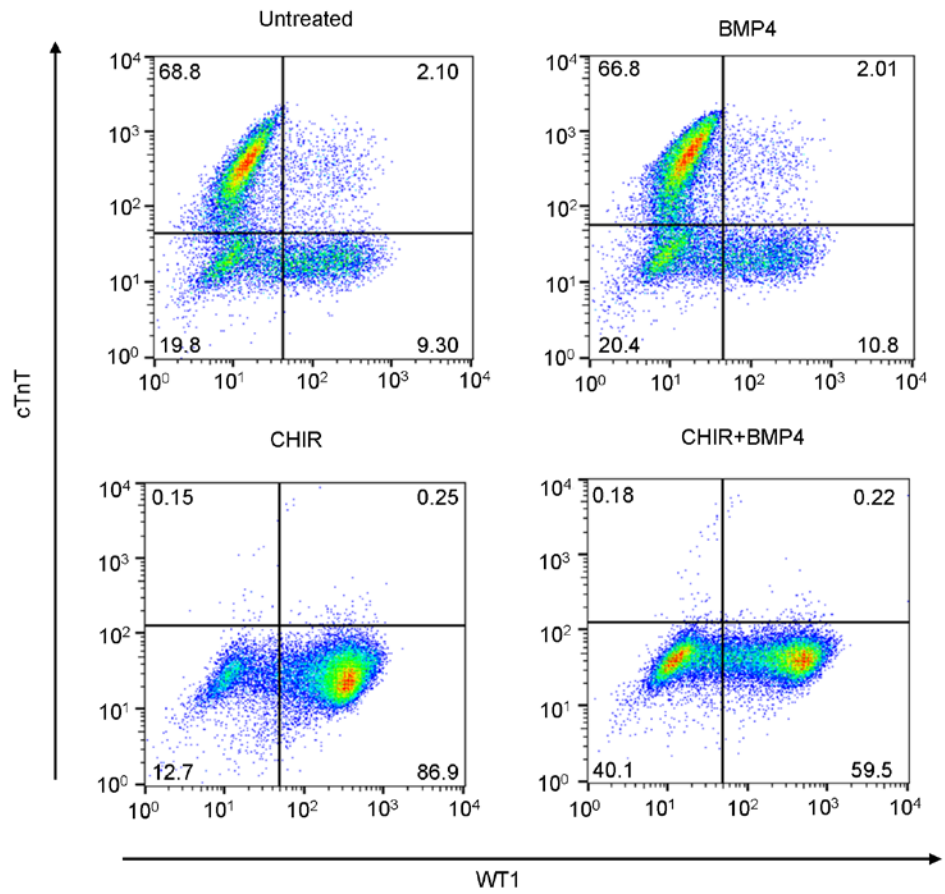**B**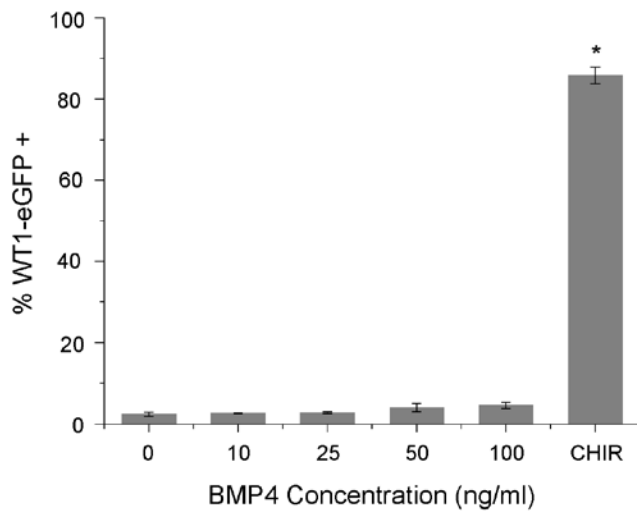**C**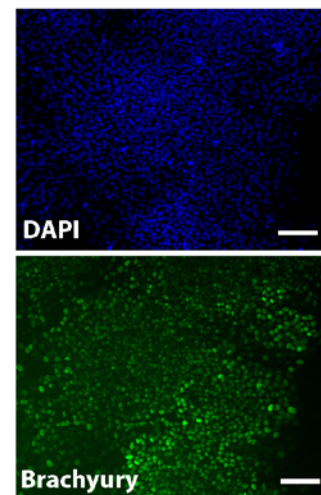

**Figure S2.** Flow cytometry analysis of cTnT and WT1 expression in day 12 hPSC-derived cell cultures.

(A) Representative flow plot of H13 hESC-derived day 12 cultures differentiated as shown in Fig. 1A in the presence or absence of 2  $\mu$ M CHIR99021 and 10 ng/mL BMP4. (B) eGFP expression in day 12 ES03 WT1-2A-eGFP hESC-derived cultures differentiated as shown in Fig. 1A with the indicated BMP4 concentration; 2  $\mu$ M CHIR is a positive control. \*  $p < 0.05$ , CHIR treatment and indicated BMP4 concentration versus 0 ng/ml BMP4. Data are represented as mean  $\pm$  SEM of three independent replicates. (C) H9 hPSCs were treated with 5 ng/ml BMP4 for 2 days and representative immunostaining images of brachyury are shown. Scale bars, 100  $\mu$ m.

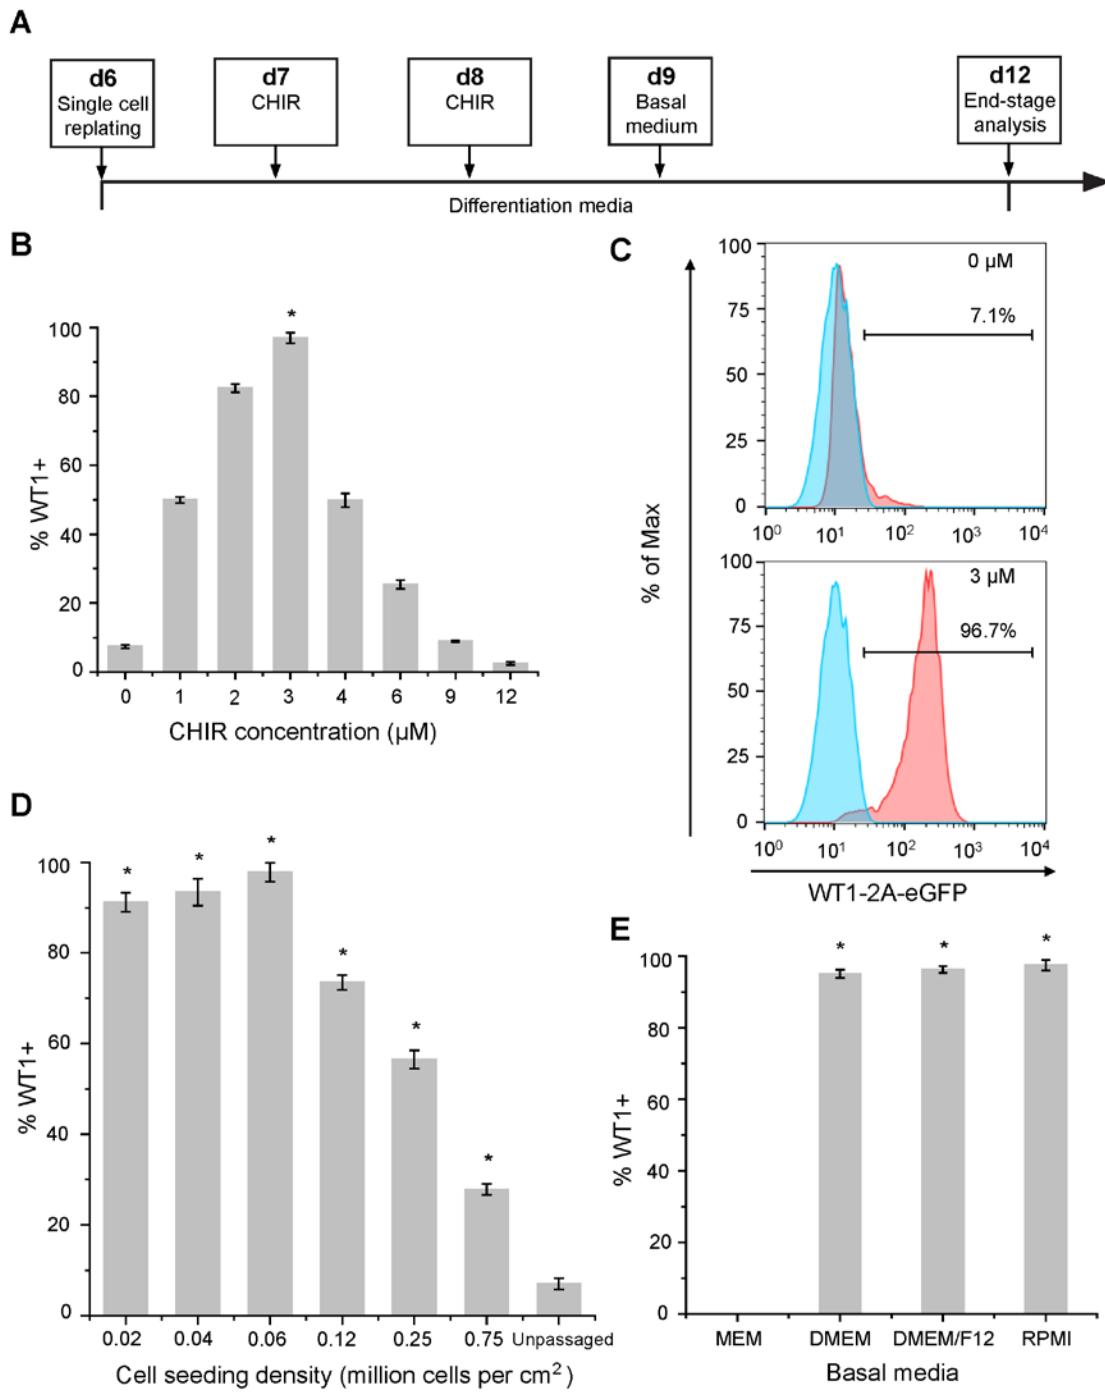

**Figure S3.** Chemically-defined, albumin-free conditions to generate WT1+ epicardial cells. (A) Schematic of the protocol for chemically-defined differentiation of hPSC-derived cardiac progenitors to WT1+ epicardial cells via GSK3 inhibition. (B) H13 hESC-derived day 6 cardiac progenitor cells were cultured as illustrated in (A) in LaSR basal medium with indicated CHIR99021 (CHIR) concentrations. At day 12, cells were analyzed for WT1 expression by flow cytometry. \*  $p < 0.05$ , 3  $\mu\text{M}$  CHIR99021 versus all other indicated CHIR concentrations. (C) Representative flow analysis of WT1-eGFP knockin ES03-derived epicardial cells differentiated with the indicated CHIR concentration. (D) H13 hESC-derived day 6 cardiac progenitor cells were cultured as illustrated in (A) with the indicated day 6 cell seeding density in LaSR basal medium. At day 12, cells were analyzed for WT1 expression by flow cytometry. \*  $p < 0.05$ , indicated cell seeding density versus unpassaged control. (E) H13 hESC-derived day 6 cardiac progenitor cells were seeded at a density of 0.06 million cells/cm<sup>2</sup> and cultured as illustrated in (A) with 3  $\mu\text{M}$  CHIR in the indicated basal media. At day 12, cells were analyzed for WT1 expression by flow cytometry. \*  $p < 0.05$ , indicated medium versus MEM. Data are represented as mean  $\pm$  SEM of five independent replicates.

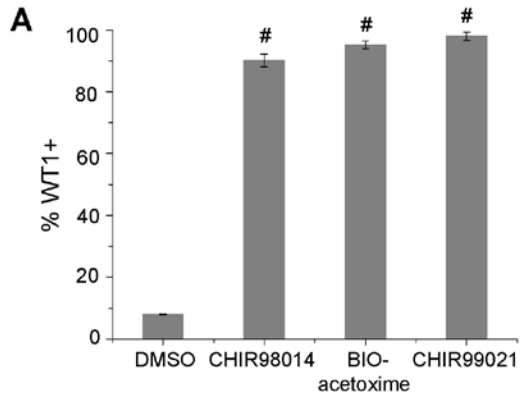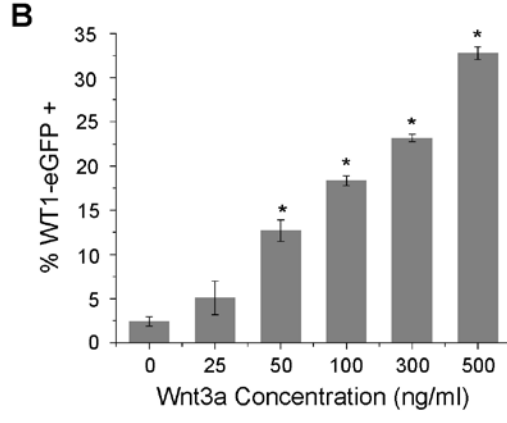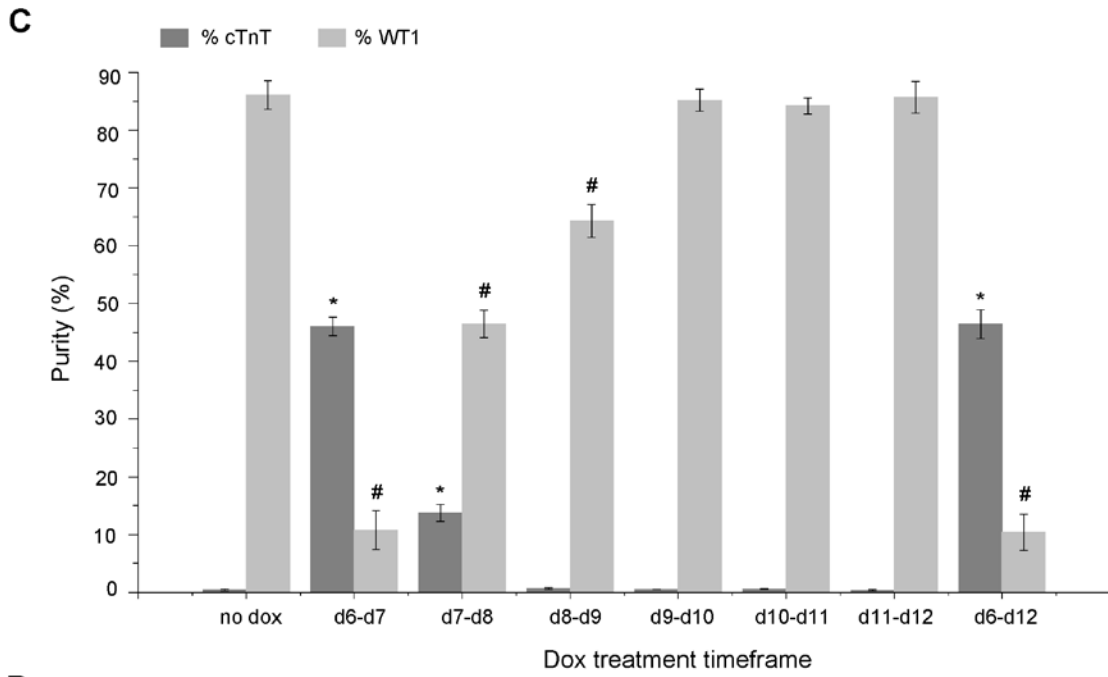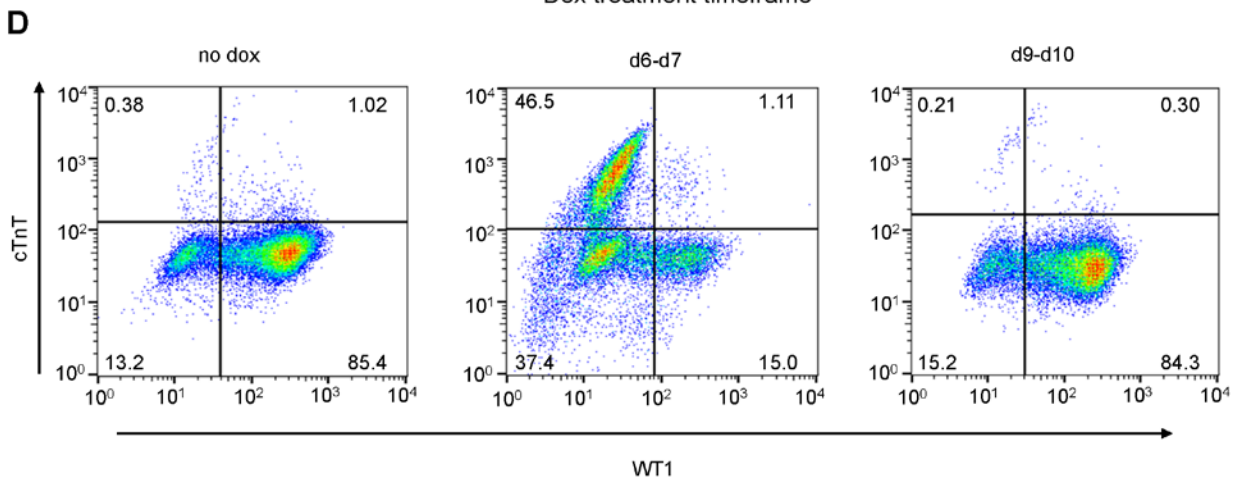

**Figure S4.** Epicardial cell differentiation from hPSC-derived cardiac progenitors is  $\beta$ -catenin dependent. (A) Day 6 H13 hESC-derived cardiac progenitor cells, generated as shown in Fig. S1A, were seeded at a density of 0.06 million cells/cm<sup>2</sup>, differentiated as illustrated in Fig. S3A in LaSR basal medium with DMSO, 0.3  $\mu$ M CHIR98014, 0.3  $\mu$ M BIO-acetoxime or 3  $\mu$ M CHIR99021 from day 7 to day 9, and subjected to flow cytometry analysis of WT1 expression at day 12. #  $p < 0.05$ , indicated treatment versus DMSO. (B) Day 6 ES03 WT1-2A-eGFP hPSC-derived cardiac progenitor cells were seeded at a density of 0.06 million cells/cm<sup>2</sup>, differentiated as illustrated in Fig. S3A in LaSR basal medium with the indicated Wnt3a treatment from day 7 to day 9, and subjected to flow cytometry analysis of eGFP expression at day 12. \*  $p < 0.05$ , indicated Wnt3a concentration versus 0 ng/ml. (C-D) 19-9-11 ishcat-1 iPSC-derived day 6 cardiac progenitor cells were differentiated as illustrated in Fig. S3A with 2  $\mu$ g/ml doxycycline addition at the indicated times. At day 12, cells were analyzed for WT1+ and cTnT+ expression by flow cytometry (C). Representative flow cytometry analysis of cTnT and WT1 expression with the indicated dox treatments are shown in (D). Data are represented as mean  $\pm$  SEM of five independent replicates. \*  $p < 0.05$ , cTnT expression with indicated dox treatment versus no dox treatment. #  $p < 0.05$ , WT1 expression with indicated dox treatment versus no dox treatment.



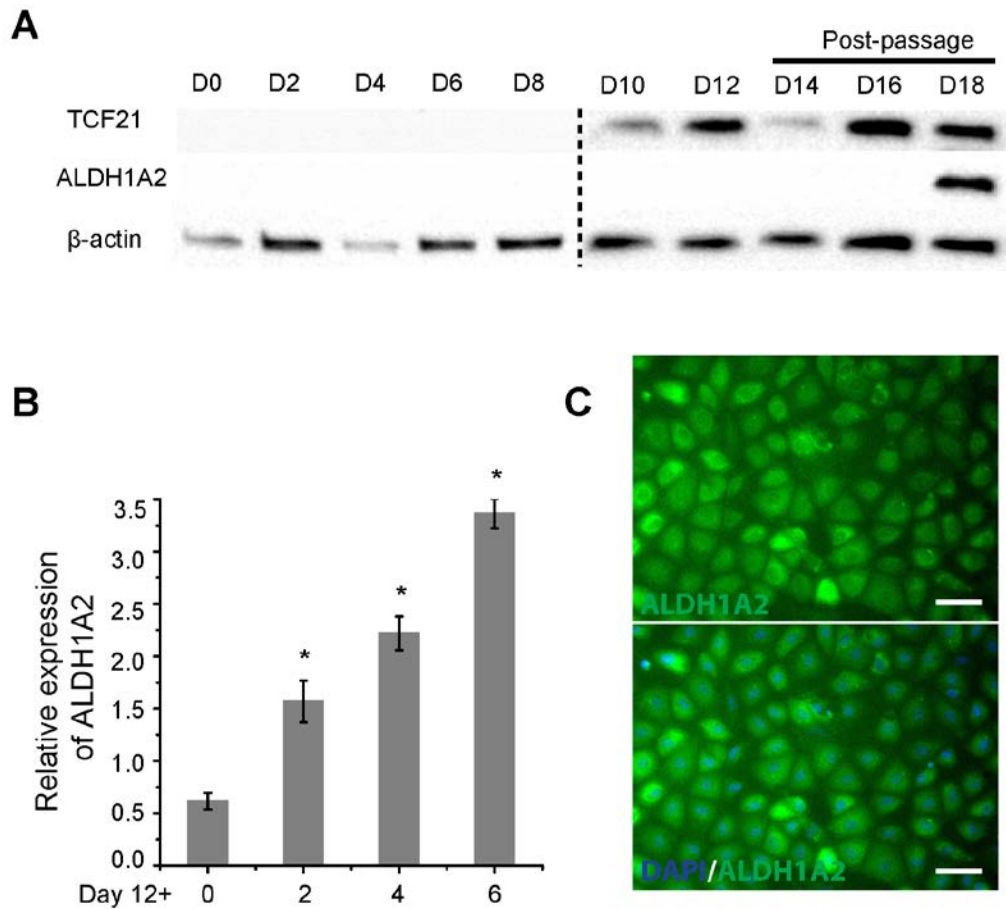

**Figure S5.** Epicardial cells mature after passage at a low density in chemically-defined medium. H13 hESC-derived day 6 cardiac progenitor cells were seeded at a density of 0.06 million cells per cm<sup>2</sup> as illustrated in Fig. 3A in RPMI/Vc/Ins medium with 3 μM CHIR99021 from day 7 to day 9. At different time points, TCF21 and ALDH1A2 (A) expression was assessed by western blot. After passage at a density of 0.05 million cells per cm<sup>2</sup> on day 12, differentiated cultures were subjected to qPCR (B) and immunostaining (C) analysis of ALDH1A2. Scale bars, 50 μm. Data are represented as mean ± SEM of three replicates. \* p<0.05, ALDH1A2 expression at indicated time points vs. day 12.

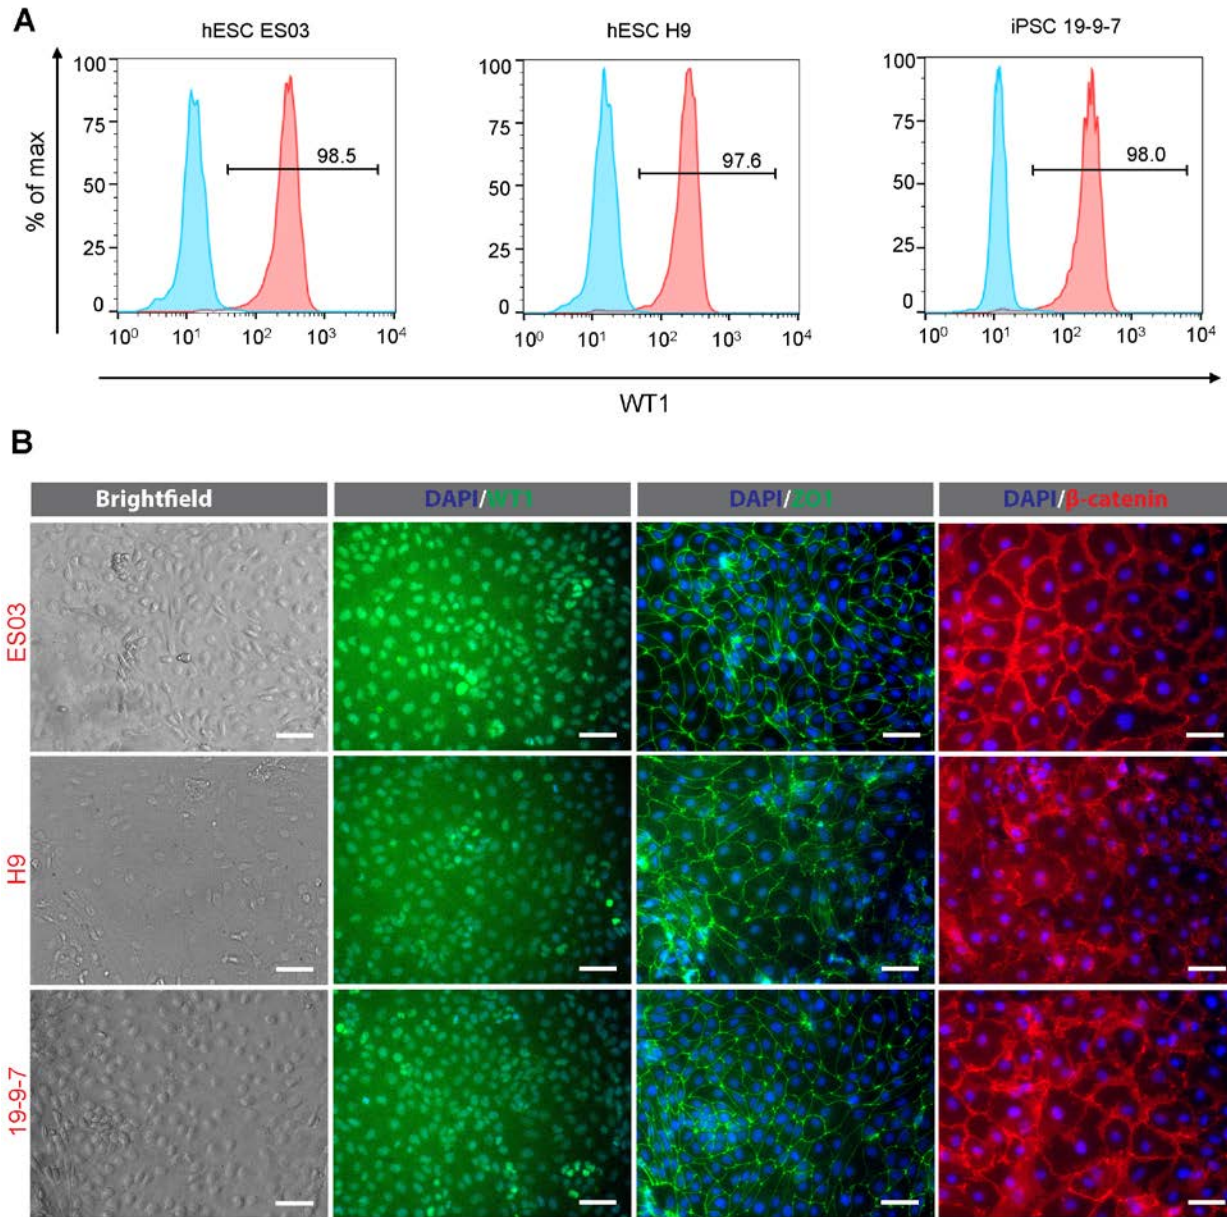

**Figure S6.** Differentiation of multiple hESC and iPSC lines to epicardial cells. Epicardial cells were generated as described in Fig. 3A from different hPSC lines: hESC H9, hESC ES03, iPSC 19-9-7. Day 12 pro-epicardial cells were subjected to flow cytometry analysis of WT1 expression (A), and representative contrast and immunostaining images of WT1, ZO1 and  $\beta$ -catenin of post-passage day 18 epicardial cells are shown in (B). Scale bars, 50  $\mu$ m.

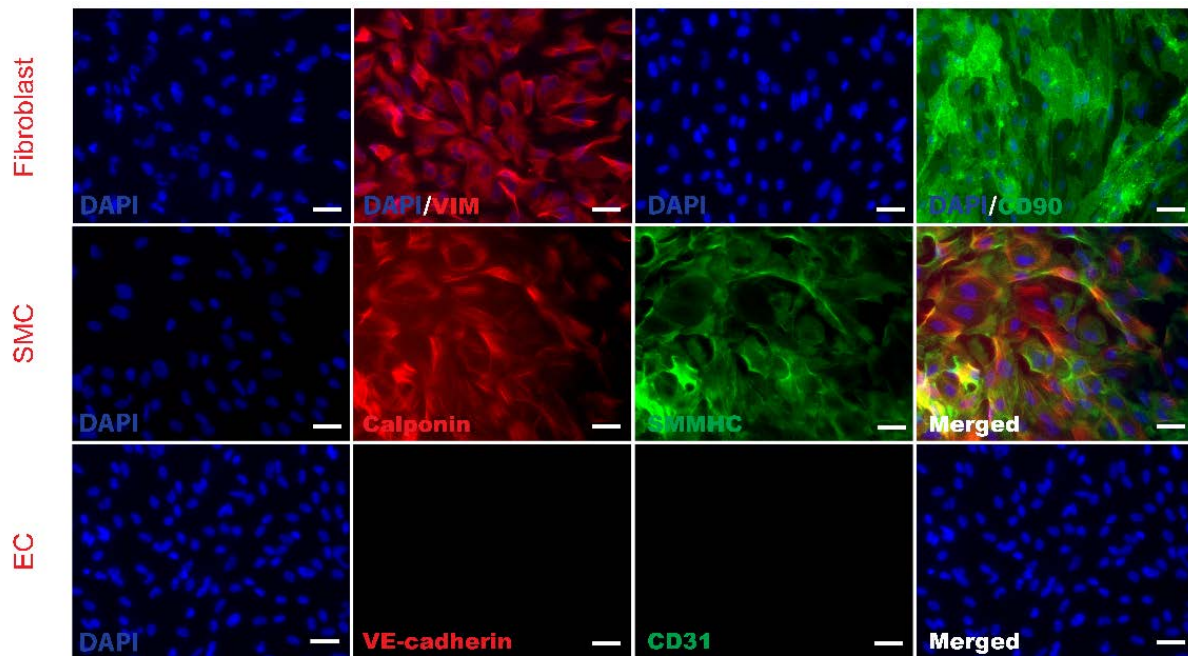

**Figure S7.** hPSC-derived epicardial cells underwent EMT in response to bFGF and TGF- $\beta$ 1 treatment. Immunostaining analysis of indicated fibroblast, smooth muscle and endothelial cell markers in LaSR basal medium with bFGF and bFGF+TGF- $\beta$ 1, and EGM-2 medium, respectively. EC: Endothelial cells; SMC: smooth muscle cells. Scale bars, 50  $\mu$ m.

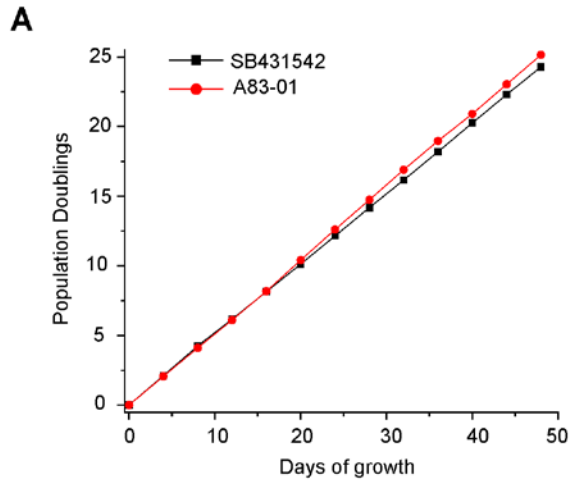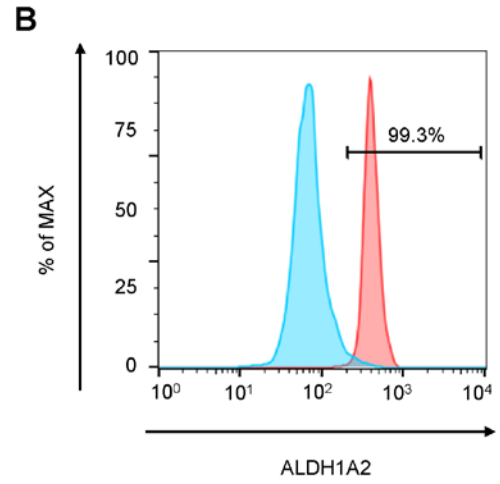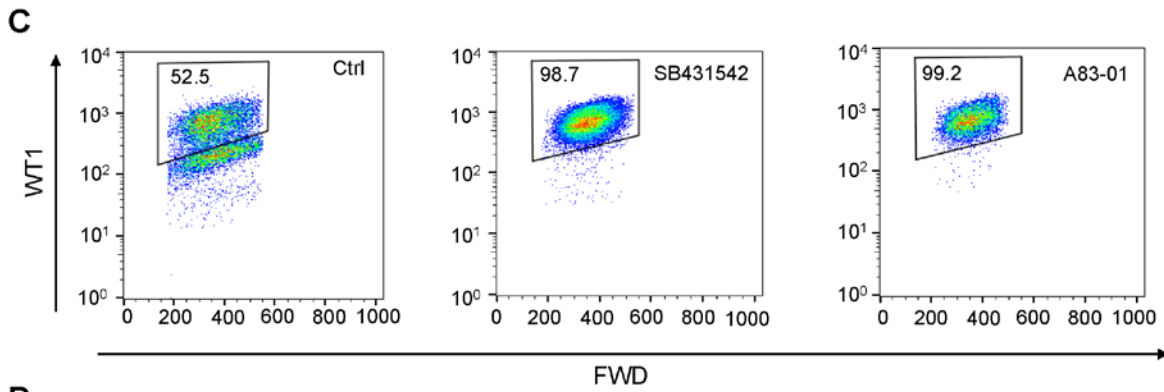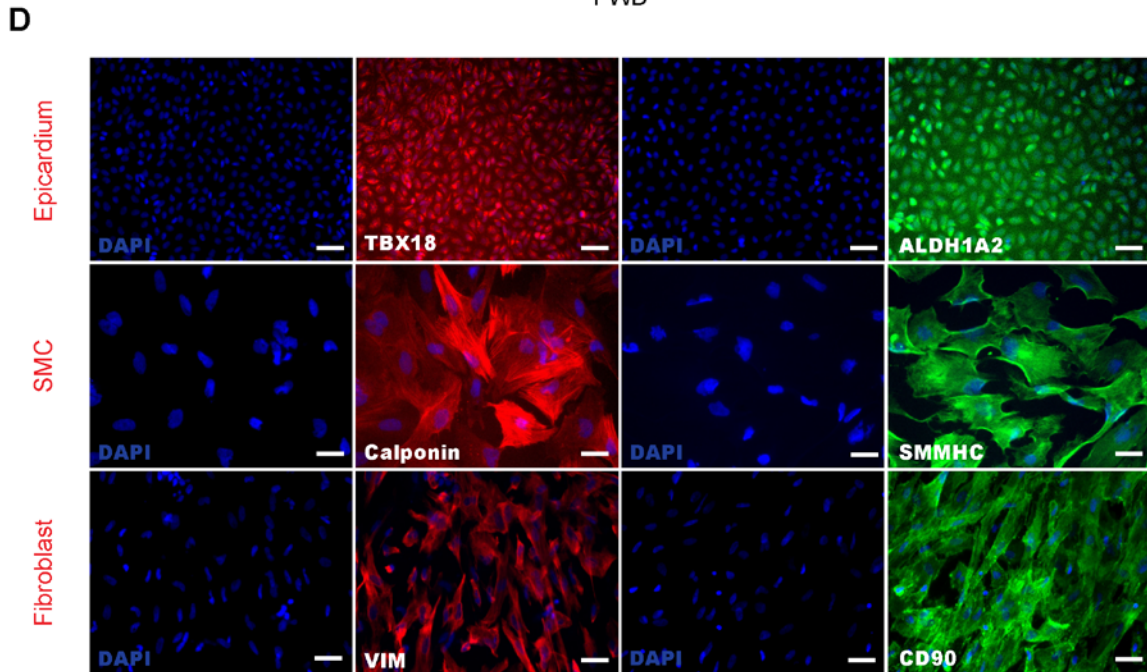

**Figure S8.** Long-term maintenance of 19-9-11 iPSC-derived epicardial cells. hPSCs were differentiated to epicardial cells as illustrated in Fig. 3A, passaged and counted every four days in the presence of the indicated TGF- $\beta$  inhibitors: 0.5  $\mu$ M A83-01 or 2  $\mu$ M SB431542. The population doublings were calculated and shown in (A), and day 48 cultures were subjected to flow analysis of ALDH1A2 (B) and WT1 (C) expression. (D) Immunostaining analysis showed day 48 expanded epicardial cells retained strong expression of TBX18 and ALDH1A2, and the potential to differentiate into SMMHC+Calponin+ smooth muscle cells and VIM+CD90+ fibroblasts. Scale bars, 50  $\mu$ m.



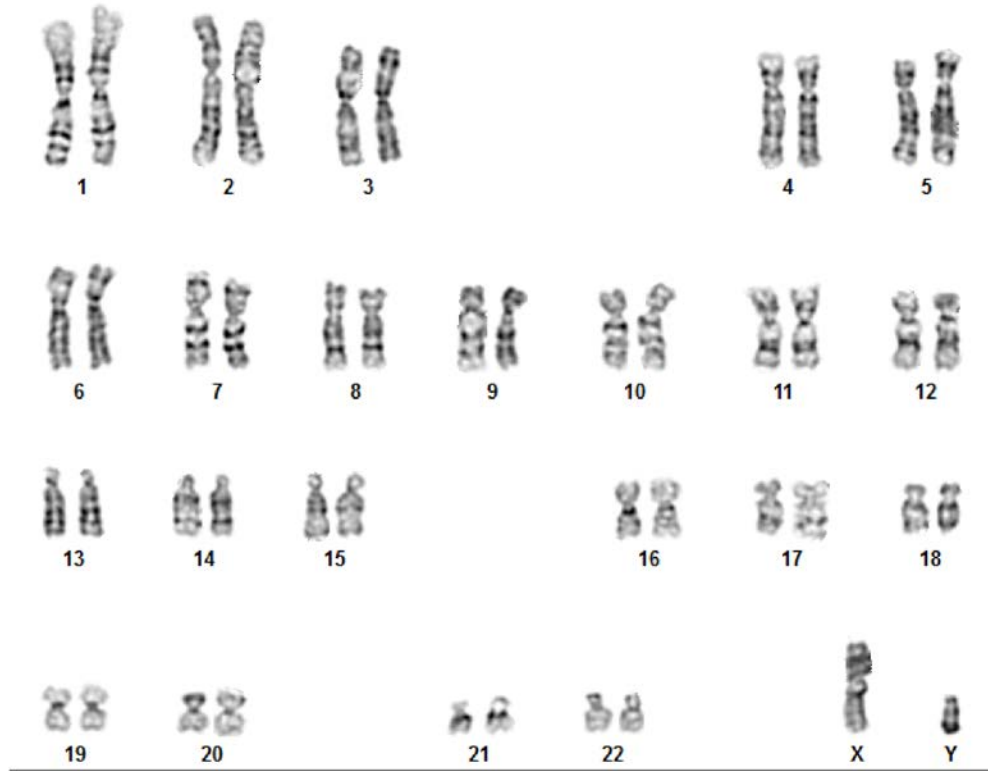

**Figure S9.** Chromosome stability of hPSC-derived epicardial cells after long-term culture. Representative karyotype analysis of H13 hESC-derived day 50 epicardial cells cultured in A83-01 containing medium. 5/5 cells karyogrammed retained a normal karyotype.

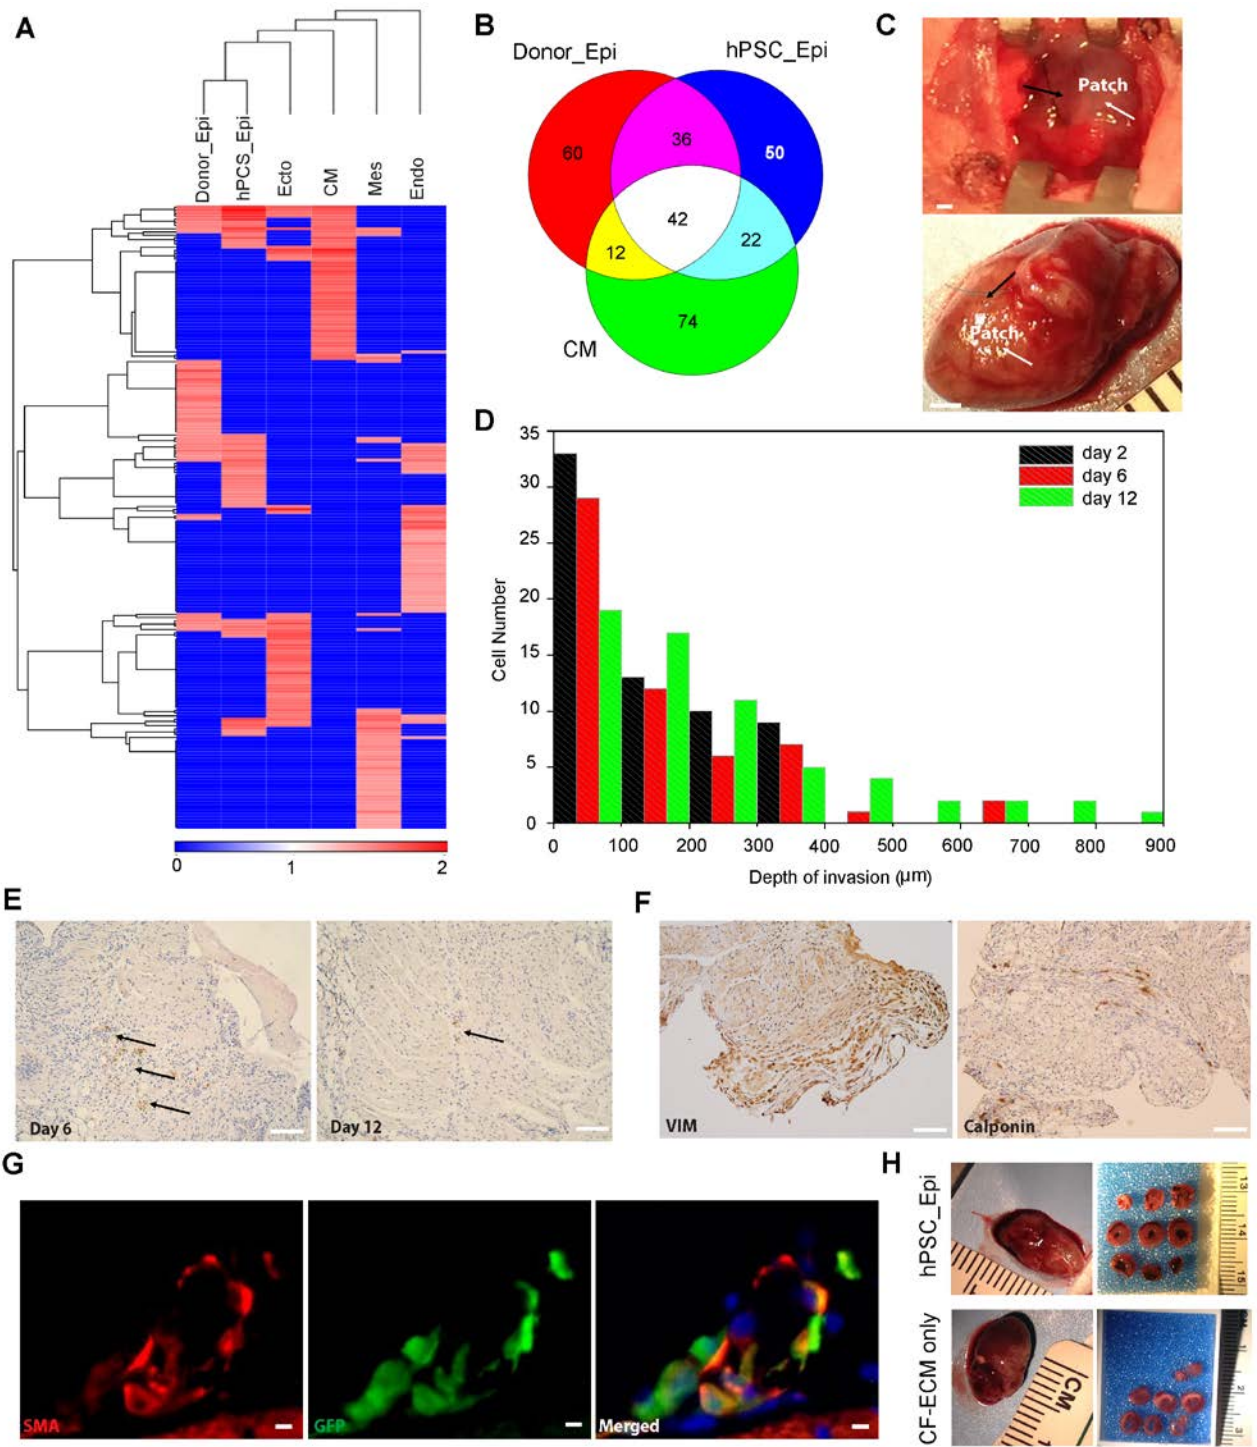

**Figure S10.** hPSC-derived epicardial cells were functionally similar to primary epicardial cells both *in vitro* and *in vivo*. (A) Hierarchical clustering of the top 50 significantly enriched pathways in indicated cell types. The color bar indicates the absolute normalized enrichment score (NES) for the enriched pathways. (B) Venn diagram showing the number of pathways which were enriched in different cell types (relative to hPSCs). The top 150 significantly enriched pathways ( $p < 0.05$ ), ranked by absolute NES for each cell type were used for analysis. (C) The cardiac fibroblast-derived extracellular matrix (CF-ECM) patch seeded with cells was photographed at time of placement (top) and 12 days after transplantation (bottom). Black arrows denote the sutures and white arrows denote the CF-ECM scaffold. Scale bars, 1 cm. Histogram distribution of depth of invasion (D) and representative photomicrographs (E) of eGFP-positive cells in 6-, and 12-day heart tissue sections are shown. Arrows denote the eGFP positive cells. (F) After 12 days, hearts were harvested and representative vimentin (VIM) and calponin stains of cross-sections of the heart are shown. Scale bars, 50  $\mu\text{m}$ . (G) Representative immunostaining images of smooth muscle actin (SMA) and GFP are shown. Scale bars, 200  $\mu\text{m}$ . (H) Non-tumorigenic potential of hPSC-derived epicardial cells after long-term culture. ES03-eGFP hESC-derived epicardial cells seeded onto CF-ECM patch were transplanted to the mouse heart and harvested for dissection after 12 days. A CF-ECM patch lacking epicardial cells was performed as a control.



**SUPPLEMENTAL TABLES**

**Table S1. Signaling modulators used in this study**

| <b>Modulator</b>                                    | <b>Targeted pathway</b> | <b>Concentration</b> |
|-----------------------------------------------------|-------------------------|----------------------|
| bFGF                                                | FGF                     | 10 ng/mL             |
| BMP4                                                | BMP                     | 0~100 ng/mL          |
| Dorsomorphin (DM)                                   | BMP                     | 4 $\mu$ M            |
| Wnt3a                                               | Wnt                     | 0~500 ng/mL          |
| IWP2                                                | Wnt                     | 5 $\mu$ M            |
| CHIR99021 (CHIR)                                    | Wnt                     | 1~9 $\mu$ M          |
| CHIR98014                                           | Wnt                     | 0.3 $\mu$ M          |
| BIO-acetoxime                                       | Wnt                     | 0.3 $\mu$ M          |
| Purmorphamine (PURM)                                | Hedgehog                | 2 $\mu$ M            |
| Retinoic acid (RA)                                  | RA                      | 2 $\mu$ M            |
| PD0325901 (PD)                                      | MEK                     | 0.5 $\mu$ M          |
| Verteporfin (VP)                                    | Hippo pathway           | 1 $\mu$ M            |
| RO4929097 (RO)                                      | Notch                   | 2 $\mu$ M            |
| TGF- $\beta$ 1                                      | TGF- $\beta$            | 5 ng/mL              |
| TGF- $\beta$ 1 antibody ( $\alpha$ -TGF- $\beta$ I) | TGF- $\beta$            | 200 $\mu$ g/mL       |
| TGF- $\beta$ pan antibody (TGF- $\beta$ Pan)        | TGF- $\beta$            | 200 $\mu$ g/mL       |
| A83-01                                              | TGF- $\beta$            | 0.5 $\mu$ M          |
| RepSox                                              | TGF- $\beta$            | 0.5 $\mu$ M          |
| SB505124                                            | TGF- $\beta$            | 2 $\mu$ M            |
| SB431542                                            | TGF- $\beta$            | 2 $\mu$ M            |

**Table S2. Purity and yield of WT1+ epicardial cells at day 12**

| <b>Cell line</b> | <b>Purity of WT1+ cells (%)</b> | <b>Yield of WT1+ cells (<math>10^5/cm^2</math>)</b> |
|------------------|---------------------------------|-----------------------------------------------------|
| ES03             | 95.74 $\pm$ 1.38                | 3.79 $\pm$ 0.09                                     |
| ES03-WT1-eGFP    | 94.74 $\pm$ 0.99                | 3.59 $\pm$ 0.24                                     |
| H9               | 93.72 $\pm$ 1.63                | 3.67 $\pm$ 0.04                                     |
| H13              | 96.88 $\pm$ 1.01                | 3.70 $\pm$ 0.19                                     |
| 19-9-7           | 96.90 $\pm$ 0.86                | 3.82 $\pm$ 0.11                                     |
| 19-9-11          | 97.82 $\pm$ 0.88                | 3.87 $\pm$ 0.05                                     |

Data are presented as mean  $\pm$  SD of three independent experiments.

**Table S3. Top 15 Gene Annotations enriched in donor epicardial cells compared to hPSCs**

| <b>GO Description</b>                                                | <b>NES</b> | <b>p-value</b> |
|----------------------------------------------------------------------|------------|----------------|
| Positive regulation of I-kappaB kinase NF kappaB cascade             | 2.068      | 0.000          |
| Regulation of I-kappaB NF kappaB cascade                             | 1.983      | 0.000          |
| Endoplasmic reticulum part                                           | 1.900      | 0.000          |
| Endoplasmic reticulum membrane                                       | 1.810      | 0.000          |
| I-kappaB kinase NF kappaB cascade                                    | 1.804      | 0.000          |
| Intrinsic to organelle membrane                                      | 1.803      | 0.000          |
| Positive regulation of signal transduction                           | 1.800      | 0.000          |
| ER to golgi vesicle mediated transport                               | 1.787      | 0.009          |
| Extracellular matrix part                                            | 1.782      | 0.000          |
| Keratinocyte differentiation                                         | 1.768      | 0.020          |
| Hematopoietin interferon class D200 domain cytokine receptor binding | 1.765      | 0.000          |
| Integral to endoplasmic reticulum membrane                           | 1.765      | 0.016          |
| ER golgi intermediate compartment                                    | 1.763      | 0.005          |
| Integral to organelle membrane                                       | 1.759      | 0.000          |
| Intrinsic to endoplasmic reticulum membrane                          | 1.758      | 0.005          |

\* NES: normalized enrichment score. P-value of 0 means <0.0001.

**Table S4. Top 15 Gene Annotations enriched in hPSC-derived epicardial cells compared to hPSCs**

| <b>GO Description</b>              | <b>NES</b> | <b>p-value</b> |
|------------------------------------|------------|----------------|
| Sulfuric ester hydrolase activity  | 1.776      | 0.004          |
| Extracellular matrix               | 1.760      | 0.000          |
| Proteinaceous extracellular matrix | 1.751      | 0.000          |
| Extracellular matrix part          | 1.727      | 0.002          |
| Muscle development                 | 1.709      | 0.000          |
| Negative regulation of cell cycle  | 1.695      | 0.002          |
| Collagen                           | 1.668      | 0.0052         |
| Cell cycle arrest GO 0007050       | 1.662      | 0.0032         |
| Muscle cell differentiation        | 1.649      | 0.011          |
| Skeletal development               | 1.637      | 0.000          |
| Skeletal muscle development        | 1.604      | 0.008          |
| Keratinocyte differentiation       | 1.600      | 0.009          |
| Myoblast differentiation           | 1.594      | 0.010          |
| Striated muscle development        | 1.576      | 0.010          |
| Contractile fiber part             | 1.572      | 0.021          |

\* NES: normalized enrichment score. P-value of 0 means <0.0001.

**Table S5. Top 15 Gene Annotations enriched in hPSC-derived cardiomyocytes (CMs) compared to hPSCs**

| <b>GO Description</b>                               | <b>NES</b> | <b>p-value</b> |
|-----------------------------------------------------|------------|----------------|
| Regulation of heart contraction                     | 2.070      | 0.000          |
| Structural constituent of muscle                    | 1.971      | 0.000          |
| Muscle development                                  | 1.890      | 0.000          |
| Mitochondrial membrane part                         | 1.842      | 0.000          |
| Myosin complex                                      | 1.832      | 0.000          |
| Growth factor activity                              | 1.819      | 0.002          |
| Mitochondrial membrane                              | 1.817      | 0.000          |
| Energy derivation by oxidation of organic compounds | 1.803      | 0.000          |
| Heart development                                   | 1.781      | 0.000          |
| Mitochondrial inner membrane                        | 1.774      | 0.000          |
| Mitochondrial respiratory chain                     | 1.758      | 0.000          |
| Mitochondrial envelope                              | 1.739      | 0.000          |
| Contractile fiber part                              | 1.696      | 0.002          |
| Generation of precursor metabolites and energy      | 1.665      | 0.000          |
| Extracellular matrix                                | 1.664      | 0.000          |

\* NES: normalized enrichment score. P-value of 0 means <0.0001.

**Table S6. Antibodies used in this study**

| <b>Antibody</b>                  | <b>Source/Isotype/clone /cat. no.</b>                  | <b>Concentration</b> |
|----------------------------------|--------------------------------------------------------|----------------------|
| Smooth muscle actin              | Lab Vision/Mouse IgG2a/ 1A4 /ms-133-p                  | 1:100 (IS)           |
| Cardiac troponin T               | Lab Vision/Mouse IgG1/ 13-11 /ms-295-p1                | 1:200 (FC& IS)       |
| ISL1                             | DSHB/Mouse IgG2b/39.4D5-s                              | 1:20 (IS)            |
| NKX2.5                           | Santa Cruz/Rabbit IgG/sc-14033/H-114                   | 1:100 (IS)           |
| Flk-1                            | Santa Cruz/Mouse IgG1/sc-6251/A-3                      | 1:200 (IS)           |
| Ki67                             | BD Biosciences/Mouse IgG1/550609                       | 1:100 (IS)           |
| WT1                              | Abcam/Rabbit IgG/ab89901                               | 1:250 (FC & IS)      |
| TCF21                            | Sigma-Aldrich/Rabbit IgG/HPA013189                     | 1:200 (IS)           |
| TBX18                            | Sigma-Aldrich/Rabbit IgG/HPA029014                     | 1:200 (IS)           |
| ALDH1A2                          | Sigma-Aldrich/Rabbit IgG/HPA010022                     | 1:50 (FC & IS)       |
| Brachyury                        | R&D Systems/Goat IgG/AF2085                            | 1:200 (IS)           |
| ZO1                              | Invitrogen/Rabbit IgG/402200                           | 1:200 (IS)           |
| $\beta$ -catenin                 | Cell Signaling/Mouse IgG1/2698/L87A12                  | 1:200 (IS)           |
| Vimentin                         | Sigma-Aldrich/Mouse IgG1/V6630/V9                      | 1:200 (IS)           |
| VE-cadherin                      | Santa Cruz/Mouse IgG1/F-8/sc9989                       | 1:100 (IS)           |
| CD31                             | ThermoFisher/Rabbit IgG/RB-10333-P                     | 1:100 (IS)           |
| CD90                             | BD Pharmingen/Mouse IgG1/559869                        | 1:200 (IS)           |
| E-cadherin                       | BD Biosciences/Mouse IgG2a/560061                      | 1:200 (IS)           |
| SMMHC                            | Abcam/Rabbit IgG/ab82541                               | 1:800 (IS)           |
| Calponin                         | Abcam/Mouse IgG1/ab700/CALP                            | 1:200 (IS)           |
| GFP                              | DSHB/Mouse IgG1/12E6                                   | 1:20 (FC & IS)       |
| GFP                              | Abcam/Rabbit IgG/ab6556                                | 1:1000 (IS)          |
| Mitochondria<br>(human specific) | Millipore/Mouse IgG1/113-1/MAB1273                     | 1:100 (IS)           |
| $\beta$ -actin                   | Cell Signaling/Rabbit mAb(HRP<br>Conjugate)/5152S/13E5 | 1:5,000(WB)          |
| Secondary Antibody               | Alexa 488 Chicken anti-Gt IgG/A-21467                  | 1:1,000              |
| Secondary Antibody               | Alexa 488 Chicken anti-Rb IgG/A-21441                  | 1:1,000              |
| Secondary Antibody               | Alexa 488 Goat anti-Ms IgG1/A-21121                    | 1:1,000              |
| Secondary Antibody               | Alexa 488 Goat anti-Rb IgG/A-11008                     | 1:1,000              |
| Secondary Antibody               | Alexa 594 Goat anti-Ms IgG2b/A-21145                   | 1:1,000              |
| Secondary Antibody               | Alexa 594 Goat anti-Rb IgG/A-11012                     | 1:1,000              |
| Secondary Antibody               | Alexa 647 Goat anti-Ms IgG2b/A-21242                   | 1:1,000              |
| Secondary Antibody               | Alexa 647 Goat anti-Rb IgG/A-21244                     | 1:1,000              |

**Table S7. Oligonucleotide primers used in this study**

| <b>Genes</b>         | <b>Sequences (5' - 3')</b>                                                 | <b>Size (bp)/Tm (°C)</b> |
|----------------------|----------------------------------------------------------------------------|--------------------------|
| <i>OCT4</i>          | <b>F:</b> CAGTGCCCGAAACCCACAC<br><b>R:</b> GGAGACCCAGCAGCCTCAAA            | 161/58                   |
| <i>NANOG</i>         | <b>F:</b> CGAAGAATAGCAATGGTGTGACG<br><b>R:</b> TTCCAAAGCAGCCTCCAAGTC       | 328/58                   |
| <i>T</i>             | <b>F:</b> AAGAAGGAAATGCAGCCTCA<br><b>R:</b> TACTGCAGGTGTGAGCAAGG           | 101/58                   |
| <i>ISL1</i>          | <b>F:</b> CACAAGCGTCTCGGGATT<br><b>R:</b> AGTGGCAAGTCTTCCGACA              | 202/58                   |
| <i>FLK-1</i>         | <b>F:</b> GTGACCAACATGGAGTCGTG<br><b>R:</b> TGCTTCACAGAAGACCATGC           | 218/60                   |
| <i>NKX2.5</i>        | <b>F:</b> GCGATTATGCAGCGTGCAATGAGT<br><b>R:</b> AACATAAATACGGGTGGGTGCGTG   | 220/58                   |
| <i>TNNT2</i>         | <b>F:</b> TTCACCAAAGATCTGCTCCTCGCT<br><b>R:</b> TTATTACTGGTGTGGAGTGGGTGTGG | 165/58                   |
| <i>TBX18</i>         | <b>F:</b> CCCAGGACTCCCTCCTATGT<br><b>R:</b> TAGGAACCCTGATGGGTCTG           | 200/59                   |
| <i>WT1</i>           | <b>F:</b> CAGCTTGAATGCATGACCTG<br><b>R:</b> GATGCCGACCGTACAAGAGT           | 200/60                   |
| <i>TCF21</i>         | <b>F:</b> ACCCTCTTCCTCGCTTTCTC<br><b>R:</b> TGCTCTCGTTGGAAGTCACA           | 180/59                   |
| <i>ALDH1A2</i>       | <b>F:</b> CTCCTCTGTACACCCCAT<br><b>R:</b> TTGACAGCTGGAAAGATGGA             | 198/59                   |
| <i>SNAI2</i>         | <b>F:</b> ACAGAGCATTTCAGACAGG<br><b>R:</b> GTGCTACACAGCAGCCAGAT            | 147/59                   |
| <i>CDH1</i>          | <b>F:</b> TTCTGCTGCTCTTGCTGTTT<br><b>R:</b> TGGCTCAAGTCAAAGTCCTG           | 142/59                   |
| <i>CDH2</i>          | <b>F:</b> CTCCAATCAACTTGCCAGAA<br><b>R:</b> ATACCAGTTGGAGGCTGGTC           | 136/58                   |
| <i>CTNNB1</i>        | <b>F:</b> GAATGAGACTGCTGATCTTGAC<br><b>R:</b> CTGATTGCTGTCACCTGGAG         | 250/58                   |
| <i>GAPDH</i>         | <b>F:</b> GTGGACCTGACCTGCCGTCT<br><b>R:</b> GGAGGAGTGGGTGTCGCTGT           | 152/58                   |
| <i>WT1 KI (Red)</i>  | <b>F:</b> GGTCTTGGTTTCTGCTGGAC<br><b>R:</b> AAGTCGTGCTGCTTCATGTG           | 2777/60                  |
| <i>WT1 KI (Blue)</i> | <b>F:</b> TGAAAAGCCCTTCAGCTGTC<br><b>R:</b> TGAGGAGGAGTGGAGAGTCAG          | 204 or 2847/60           |

## LEGENDS FOR SUPPLEMENTAL MOVIES

**Movie S1**, H13 hESC-derived day 6 cardiac progenitors were differentiated with 3  $\mu$ M CHIR99021 from day 7 to day 9 as described in Fig. 1A in LaSR basal medium. Movie S1 shows day 12 non-contracting pro-epicardial cells.

**Movie S2**, H13 hESC-derived day 6 cardiac progenitors were differentiated with 10 ng/mL BMP4 from day 7 to day 9 as described in Fig. 1A in LaSR basal medium. Movie S2 shows day 12 spontaneously contracting cardiomyocytes.

**Movie S3**, 19-9-11 ishcat-1 iPSC-derived day 6 cardiac progenitors were differentiated with 2  $\mu$ g/ml doxycycline addition from day 6 to day 7 as described in Fig. 3A in RPMI/Vc/Ins medium. Movie S3 shows day 12 spontaneously contracting cardiomyocytes.

**Movie S4**, 19-9-11 ishcat-1 iPSC-derived day 6 cardiac progenitors were differentiated with no doxycycline treatment as described in Fig. 3A in RPMI/Vc/Ins medium. Movie S4 shows day 12 non-contracting pro-epicardial cells.
